# Supplementary material for: Association between continuity of care (COC), healthcare use and costs: what can we learn from claims data? A rapid review
Source: Springer Nature journal article supplement (doi:10.1186/s12913-022-07953-z), 2022-05-16
Supplement: MOESM1 [file 20417860]

Medline via Pubmed (<https://pubmed.ncbi.nlm.nih.gov>)

"Continuity of Patient Care"[Mesh] OR "continuity" [tiab] OR collaborat\* [tiab] OR communic\* [tiab] OR coord\* [tiab] OR care integration [tiab] AND ("index" [tiab] OR indic\* [tiab] OR "measur\*" [tiab] OR "indicator\*" [tiab]) AND ("Insurance Claim Review"[MeSH] OR "claims-based data"[tiab] OR "claims data"[tiab] OR "billing data"[tiab] OR "hospitalisation data"[tiab] OR "hospitalization data"[tiab] OR insurance claim\*[tiab] OR "insurance data"[tiab])

**Output:** 580 (date of initial search: 01 April 2019)

Embase ([www.embase.com](http://www.embase.com))

| History                  |     | Save                                          | Delete | Print view | Export | Email | Combine > | using <input checked="" type="radio"/> And <input type="radio"/> Or | ^ Collapse |
|--------------------------|-----|-----------------------------------------------|--------|------------|--------|-------|-----------|---------------------------------------------------------------------|------------|
| <input type="checkbox"/> | #19 | #16 AND #17 AND [1-1-1966]sd NOT [2-4-2019]sd |        |            |        |       |           |                                                                     | 942        |
| <input type="checkbox"/> | #18 | #16 AND #17                                   |        |            |        |       |           |                                                                     | 1,364      |
| <input type="checkbox"/> | #17 | #14 AND #15                                   |        |            |        |       |           |                                                                     | 501,517    |
| <input type="checkbox"/> | #16 | #10 OR #11 OR #12 OR #13                      |        |            |        |       |           |                                                                     | 29,038     |
| <input type="checkbox"/> | #15 | #7 OR #8 OR #9                                |        |            |        |       |           |                                                                     | 9,240,678  |
| <input type="checkbox"/> | #14 | #1 OR #2 OR #3 OR #4 OR #5 OR #6              |        |            |        |       |           |                                                                     | 1,854,049  |
| <input type="checkbox"/> | #13 | insurance NEAR/2 claim*                       |        |            |        |       |           |                                                                     | 7,094      |
| <input type="checkbox"/> | #12 | claim* NEAR/2 data                            |        |            |        |       |           |                                                                     | 21,191     |
| <input type="checkbox"/> | #11 | insurance NEAR/2 data                         |        |            |        |       |           |                                                                     | 4,352      |
| <input type="checkbox"/> | #10 | 'billing and claims'/exp                      |        |            |        |       |           |                                                                     | 1,991      |
| <input type="checkbox"/> | #9  | measur*.ab,ti                                 |        |            |        |       |           |                                                                     | 4,904,421  |
| <input type="checkbox"/> | #8  | indic*.ab,ti                                  |        |            |        |       |           |                                                                     | 4,551,159  |
| <input type="checkbox"/> | #7  | index*.ab,ti                                  |        |            |        |       |           |                                                                     | 1,337,695  |
| <input type="checkbox"/> | #6  | integration NEAR/2 care                       |        |            |        |       |           |                                                                     | 1,917      |
| <input type="checkbox"/> | #5  | coord*.ab,ti                                  |        |            |        |       |           |                                                                     | 332,899    |
| <input type="checkbox"/> | #4  | communic*.ab,ti                               |        |            |        |       |           |                                                                     | 454,286    |
| <input type="checkbox"/> | #3  | collaborat*.ab,ti                             |        |            |        |       |           |                                                                     | 239,636    |
| <input type="checkbox"/> | #2  | continuity.ab,ti                              |        |            |        |       |           |                                                                     | 50,135     |
| <input type="checkbox"/> | #1  | 'continuity of patient care'/exp              |        |            |        |       |           |                                                                     | 913,460    |

Cochrane library (<https://www.cochranelibrary.com>)

|                          |                          | View fewer lines | Print                                    |        |        |
|--------------------------|--------------------------|------------------|------------------------------------------|--------|--------|
| <input type="checkbox"/> | <input type="checkbox"/> | #1               | (Continuity).ti,ab,kw                    | Limits | 2616   |
| <input type="checkbox"/> | <input type="checkbox"/> | #2               | collaborat*.ab,ti                        | Limits | 12971  |
| <input type="checkbox"/> | <input type="checkbox"/> | #3               | communic*.ab,ti                          | Limits | 23008  |
| <input type="checkbox"/> | <input type="checkbox"/> | #4               | coord*.ab,ti                             | Limits | 11350  |
| <input type="checkbox"/> | <input type="checkbox"/> | #5               | integration NEAR/2 care                  | Limits | 141    |
| <input type="checkbox"/> | <input type="checkbox"/> | #6               | index*.ab,ti                             | Limits | 139620 |
| <input type="checkbox"/> | <input type="checkbox"/> | #7               | indic*.ab,ti                             | Limits | 181394 |
| <input type="checkbox"/> | <input type="checkbox"/> | #8               | measur*.ab,ti                            | Limits | 476687 |
| <input type="checkbox"/> | <input type="checkbox"/> | #9               | 'billing and claims'                     | Limits | 51     |
| <input type="checkbox"/> | <input type="checkbox"/> | #10              | Claims data                              | Limits | 2901   |
| <input type="checkbox"/> | <input type="checkbox"/> | #11              | Any MeSH descriptor in all MeSH products | MeSH ▾ | 0      |
| <input type="checkbox"/> | <input type="checkbox"/> | #12              | Insurance Claim Reporting                | Limits | 52     |
| <input type="checkbox"/> | <input type="checkbox"/> | #13              | Continuity of Patient Care               | Limits | 1634   |
| <input type="checkbox"/> | <input type="checkbox"/> | #14              | #13 OR #12 OR #1 OR #2 OR #3 OR #4 OR #5 | Limits | 47117  |
| <input type="checkbox"/> | <input type="checkbox"/> | #15              | #6 OR #7 OR #8                           | Limits | 655598 |
| <input type="checkbox"/> | <input type="checkbox"/> | #16              | #9 OR #10                                | Limits | 2901   |
| <input type="checkbox"/> | <input type="checkbox"/> | #17              | #14 AND #15 AND #16                      | Limits | 139    |

with Cochrane Library publication date from Jan 1900 to Apr 2019
